# Supplementary material for: Identification of Cassava MicroRNAs under Abiotic Stress
Source: PubMed Central journal article supplement (PMC3845235; doi:10.1155/2013/857986), 2013-11-14
Supplement: 857986.f1.pdf [file 857986.f1.pdf]

# Identification of Cassava MicroRNAs under Abiotic Stress

Carolina Ballén-Taborda<sup>1</sup>, Germán Plata<sup>2</sup>, Sarah Ayling<sup>3</sup>, Fausto Rodríguez-Zapata<sup>1</sup>, Luis Augusto Becerra Lopez-Lavalle<sup>1</sup>, Jorge Duitama<sup>1</sup> & Joe Tohme<sup>1</sup>

<sup>1</sup>Agrobiodiversity and Biotechnology Project. International Center for Tropical Agriculture (CIAT). A.A. 6713, Cali, 76001000, Colombia. <sup>2</sup>Department of Systems Biology, Columbia University, 1130 St. Nicholas Ave. New York, NY 10032, USA. <sup>3</sup>The Genome Analysis Centre, Norwich Research Park, Norwich, NR4 7UH, UK.

## SUPPLEMENTARY MATERIALS

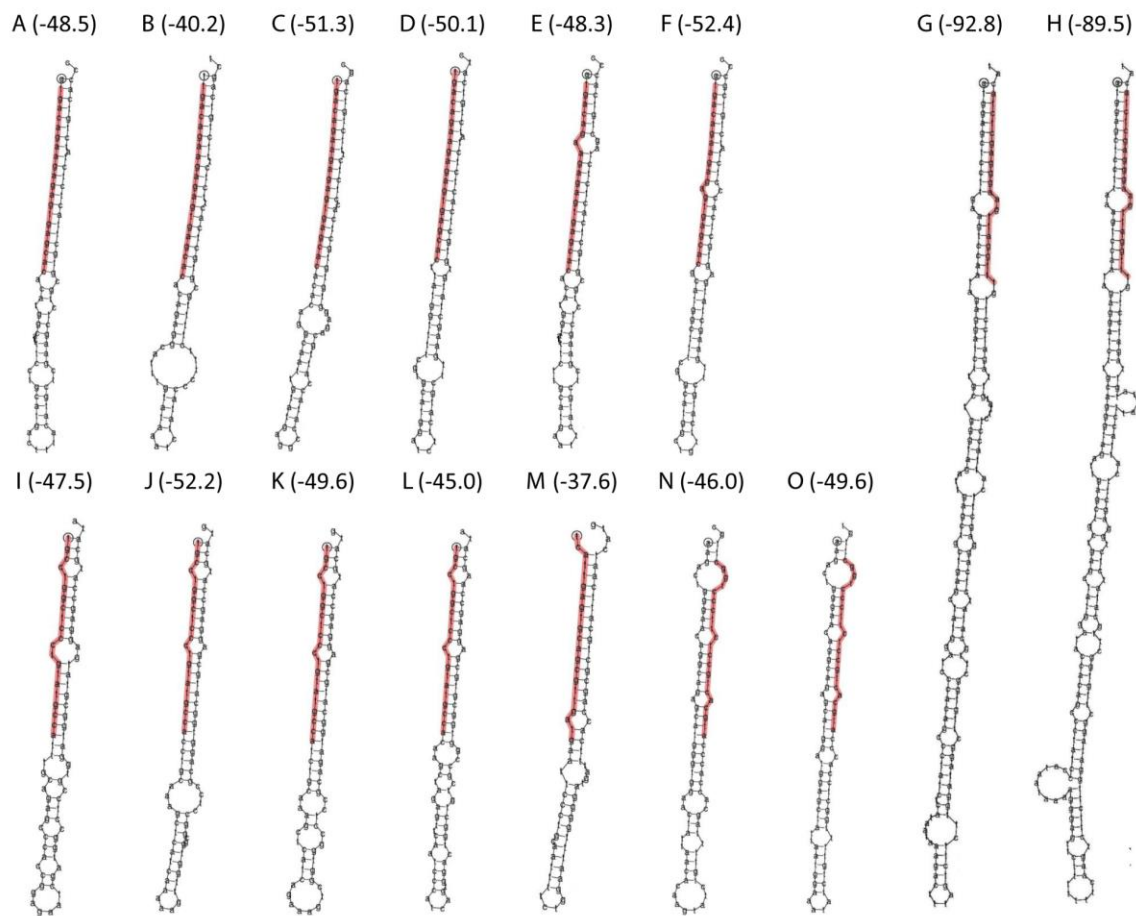

**Supplementary figure 1.** Secondary structure of the precursors of validated miRNAs: mes-miR156a (A, B, C, D, E, F), mes-miR159a (G, H), mes-miR160a (I, J, K, L), mes-miR397a (M) and mes-miR408 (N, O). The miRNA sequences are highlighted in red, folding free energies (kcal/mol) calculated with RNAfold [1] are shown in parentheses.

**Supplementary table 1.** Summary of the identification of cassava miRNAs.

|                                                       |                                                  |                      |
|-------------------------------------------------------|--------------------------------------------------|----------------------|
| Raw reads from deep-sequencing                        | 14,565,645 Total Reads                           |                      |
| Adaptor and quality trimming                          | 9,570,232 Total Reads                            |                      |
| Removal of rRNA, tRNA, snRNA, snoRNAs                 | 598,120 Collapsed Reads<br>2,920,905 Total Reads |                      |
| 20-25nt filtering                                     | 391,453 Collapsed Reads<br>1,553,668 Total Reads |                      |
|                                                       | <b>Conserved</b>                                 | <b>Non-Conserved</b> |
| Total collapsed Reads                                 | 981                                              | 390,472              |
| Aligned to the genome                                 | 146 (14.88%)                                     | 151,390 (38.77%)     |
| Aligned to the genome at less than 30 loci            | 146                                              | 138,604              |
| Number of precursors                                  | 338                                              | 441,567              |
| Validated By MirDeep-P / clusters                     | 114 / 64                                         | 12247 / 8325         |
| Precursors Validated by Meyers 2008 Filter / clusters | 106 / 60<br>(grouping 118 reads)                 | 1103 / 821           |
| Families of know miRNAs                               | 26                                               | --                   |

**Supplementary table 2.** Sensitivity / Specificity analysis for different values of the minimum score parameter (-v) of miRDeep-P. Selected parameter is highlighted in blue.

| <b>Score<br/>Cut-off</b> | <b><i>A. thaliana</i><br/>Sensitivity (%)</b> | <b><i>A. thaliana</i><br/>False Positive Rate (%)</b> | <b><i>M. esculenta</i><br/>False Positive Rate (%)</b> |
|--------------------------|-----------------------------------------------|-------------------------------------------------------|--------------------------------------------------------|
| Default                  | 5.04                                          | 1.12                                                  | 0.99                                                   |
| 10                       | 0.00                                          | 0.00                                                  | 0.00                                                   |
| 5                        | 4.45                                          | 0.00                                                  | 0.00                                                   |
| 0                        | 6.53                                          | 1.12                                                  | 0.99                                                   |
| <b>-1</b>                | <b>37.39</b>                                  | <b>1.36</b>                                           | <b>1.74</b>                                            |
| -5                       | 39.47                                         | 1.37                                                  | 1.82                                                   |
| -10                      | 39.47                                         | 1.37                                                  | 1.86                                                   |
| -25                      | 39.47                                         | 1.37                                                  | 1.86                                                   |
| -50                      | 39.47                                         | 1.37                                                  | 1.87                                                   |
| -80                      | 39.47                                         | 1.37                                                  | 1.88                                                   |

**Supplementary table 3.** Significantly enriched GO terms among targets of candidate conserved cassava miRNAs. Results are based on the hypergeometric test corrected for multiple hypotheses (see Methods). The table is sorted by GO term type P: Biological process, F: Molecular function, C: Cellular component and by ascending FDR adjusted p-value.

| GO term    | Ontology | Description                                                                         | Number of target genes | Number of total genes | p-value  |
|------------|----------|-------------------------------------------------------------------------------------|------------------------|-----------------------|----------|
| GO:0032774 | P        | RNA biosynthetic process                                                            | 42                     | 1549                  | 1.30E-06 |
| GO:0045449 | P        | regulation of transcription                                                         | 40                     | 1402                  | 1.30E-06 |
| GO:0080090 | P        | regulation of primary metabolic process                                             | 40                     | 1423                  | 1.30E-06 |
| GO:0060255 | P        | regulation of macromolecule metabolic process                                       | 40                     | 1433                  | 1.30E-06 |
| GO:0031326 | P        | regulation of cellular biosynthetic process                                         | 40                     | 1419                  | 1.30E-06 |
| GO:0010468 | P        | regulation of gene expression                                                       | 40                     | 1426                  | 1.30E-06 |
| GO:0019219 | P        | regulation of nucleobase, nucleoside, nucleotide and nucleic acid metabolic process | 40                     | 1408                  | 1.30E-06 |
| GO:0009889 | P        | regulation of biosynthetic process                                                  | 40                     | 1419                  | 1.30E-06 |
| GO:0051171 | P        | regulation of nitrogen compound metabolic process                                   | 40                     | 1408                  | 1.30E-06 |
| GO:0051252 | P        | regulation of RNA metabolic process                                                 | 40                     | 1396                  | 1.30E-06 |
| GO:0006355 | P        | regulation of transcription, DNA-dependent                                          | 40                     | 1396                  | 1.30E-06 |
| GO:0010556 | P        | regulation of macromolecule biosynthetic process                                    | 40                     | 1419                  | 1.30E-06 |
| GO:0006350 | P        | transcription                                                                       | 42                     | 1547                  | 1.30E-06 |
| GO:0006351 | P        | transcription, DNA-dependent                                                        | 42                     | 1545                  | 1.30E-06 |
| GO:0031323 | P        | regulation of cellular metabolic process                                            | 40                     | 1451                  | 1.50E-06 |
| GO:0019222 | P        | regulation of metabolic process                                                     | 40                     | 1464                  | 1.70E-06 |
| GO:0016070 | P        | RNA metabolic process                                                               | 43                     | 1803                  | 1.90E-05 |
| GO:0006139 | P        | nucleobase, nucleoside, nucleotide and nucleic acid metabolic process               | 50                     | 2280                  | 3.10E-05 |
| GO:0050794 | P        | regulation of cellular process                                                      | 45                     | 1970                  | 3.10E-05 |
| GO:0050789 | P        | regulation of biological process                                                    | 45                     | 1994                  | 3.90E-05 |
| GO:0065007 | P        | biological regulation                                                               | 45                     | 2093                  | 0.00012  |
| GO:0034645 | P        | cellular macromolecule biosynthetic process                                         | 47                     | 2376                  | 0.00047  |
| GO:0009719 | P        | response to endogenous stimulus                                                     | 5                      | 39                    | 0.00047  |
| GO:0009059 | P        | macromolecule biosynthetic process                                                  | 47                     | 2379                  | 0.00047  |
| GO:0010033 | P        | response to organic substance                                                       | 5                      | 39                    | 0.00047  |
| GO:0009725 | P        | response to hormone stimulus                                                        | 5                      | 39                    | 0.00047  |
| GO:0006807 | P        | nitrogen compound metabolic process                                                 | 50                     | 2594                  | 0.00049  |
| GO:0010467 | P        | gene expression                                                                     | 46                     | 2339                  | 0.00055  |
| GO:0044260 | P        | cellular macromolecule metabolic process                                            | 76                     | 4740                  | 0.0031   |
| GO:0044249 | P        | cellular biosynthetic process                                                       | 48                     | 2906                  | 0.013    |
| GO:0009058 | P        | biosynthetic process                                                                | 50                     | 3122                  | 0.019    |
| GO:0043170 | P        | macromolecule metabolic process                                                     | 77                     | 5303                  | 0.027    |
| GO:0012501 | P        | programmed cell death                                                               | 6                      | 152                   | 0.037    |
| GO:0006915 | P        | apoptosis                                                                           | 6                      | 152                   | 0.037    |

|            |   |                                                                                    |     |       |          |
|------------|---|------------------------------------------------------------------------------------|-----|-------|----------|
| GO:0005507 | F | copper ion binding                                                                 | 15  | 126   | 8.60E-10 |
| GO:0003677 | F | DNA binding                                                                        | 52  | 2000  | 9.20E-07 |
| GO:0016818 | F | hydrolase activity, acting on acid anhydrides, in phosphorus-containing anhydrides | 22  | 699   | 0.00032  |
| GO:0016817 | F | hydrolase activity, acting on acid anhydrides                                      | 22  | 712   | 0.00032  |
| GO:0005524 | F | ATP binding                                                                        | 50  | 2455  | 0.00044  |
| GO:0032559 | F | adenyl ribonucleotide binding                                                      | 50  | 2520  | 0.00051  |
| GO:0030554 | F | adenyl nucleotide binding                                                          | 52  | 2652  | 0.00051  |
| GO:0001883 | F | purine nucleoside binding                                                          | 52  | 2652  | 0.00051  |
| GO:0001882 | F | nucleoside binding                                                                 | 52  | 2666  | 0.00051  |
| GO:0017076 | F | purine nucleotide binding                                                          | 53  | 2996  | 0.0033   |
| GO:0032555 | F | purine ribonucleotide binding                                                      | 51  | 2859  | 0.0033   |
| GO:0032553 | F | ribonucleotide binding                                                             | 51  | 2859  | 0.0033   |
| GO:0000166 | F | nucleotide binding                                                                 | 55  | 3175  | 0.0037   |
| GO:0003676 | F | nucleic acid binding                                                               | 56  | 3315  | 0.0054   |
| GO:0005488 | F | binding                                                                            | 154 | 11438 | 0.027    |
| GO:0005634 | C | nucleus                                                                            | 32  | 836   | 3.40E-08 |
| GO:0043231 | C | intracellular membrane-bounded organelle                                           | 32  | 1196  | 3.30E-05 |
| GO:0043227 | C | membrane-bounded organelle                                                         | 32  | 1203  | 3.30E-05 |
| GO:0043229 | C | intracellular organelle                                                            | 34  | 1803  | 0.0062   |
| GO:0043226 | C | organelle                                                                          | 34  | 1803  | 0.0062   |

**Supplementary table 4.** Significantly enriched GO terms among targets of candidate non-conserved cassava miRNAs. Results are based on the hypergeometric test corrected for multiple hypotheses (See Methods). The table is sorted by GO term type P: Biological process, F: Molecular function, C: Cellular component and by ascending FDR adjusted p-value.

| GO term    | Ontology | Description                                                                        | Number of target genes | Number of total genes | p-value  |
|------------|----------|------------------------------------------------------------------------------------|------------------------|-----------------------|----------|
| GO:0008219 | P        | cell death                                                                         | 34                     | 175                   | 0.0036   |
| GO:0016265 | P        | death                                                                              | 34                     | 175                   | 0.0036   |
| GO:0006915 | P        | apoptosis                                                                          | 30                     | 152                   | 0.0045   |
| GO:0012501 | P        | programmed cell death                                                              | 30                     | 152                   | 0.0045   |
| GO:0043412 | P        | macromolecule modification                                                         | 194                    | 1729                  | 0.024    |
| GO:0043687 | P        | post-translational protein modification                                            | 177                    | 1556                  | 0.024    |
| GO:0006464 | P        | protein modification process                                                       | 188                    | 1674                  | 0.025    |
| GO:0032559 | F        | adenyl ribonucleotide binding                                                      | 330                    | 2520                  | 2.40E-10 |
| GO:0001883 | F        | purine nucleoside binding                                                          | 336                    | 2652                  | 2.00E-09 |
| GO:0001882 | F        | nucleoside binding                                                                 | 337                    | 2666                  | 2.00E-09 |
| GO:0005524 | F        | ATP binding                                                                        | 314                    | 2455                  | 2.00E-09 |
| GO:0030554 | F        | adenyl nucleotide binding                                                          | 336                    | 2652                  | 2.00E-09 |
| GO:0032555 | F        | purine ribonucleotide binding                                                      | 344                    | 2859                  | 1.70E-07 |
| GO:0032553 | F        | ribonucleotide binding                                                             | 344                    | 2859                  | 1.70E-07 |
| GO:0017076 | F        | purine nucleotide binding                                                          | 350                    | 2996                  | 2.10E-06 |
| GO:0043531 | F        | ADP binding                                                                        | 39                     | 176                   | 3.20E-06 |
| GO:0005515 | F        | protein binding                                                                    | 449                    | 4011                  | 4.70E-06 |
| GO:0000166 | F        | nucleotide binding                                                                 | 363                    | 3175                  | 7.20E-06 |
| GO:0016887 | F        | ATPase activity                                                                    | 66                     | 404                   | 2.30E-05 |
| GO:0017111 | F        | nucleoside-triphosphatase activity                                                 | 96                     | 661                   | 2.30E-05 |
| GO:0016462 | F        | pyrophosphatase activity                                                           | 98                     | 678                   | 2.30E-05 |
| GO:0016818 | F        | hydrolase activity, acting on acid anhydrides, in phosphorus-containing anhydrides | 99                     | 699                   | 4.60E-05 |
| GO:0016817 | F        | hydrolase activity, acting on acid anhydrides                                      | 100                    | 712                   | 5.60E-05 |
| GO:0004672 | F        | protein kinase activity                                                            | 163                    | 1445                  | 0.014    |
| GO:0016773 | F        | phosphotransferase activity, alcohol group as acceptor                             | 175                    | 1608                  | 0.041    |
| GO:0042623 | F        | ATPase activity, coupled                                                           | 37                     | 251                   | 0.041    |
| GO:0042626 | F        | ATPase activity, coupled to transmembrane movement of substances                   | 20                     | 110                   | 0.045    |
| GO:0043492 | F        | ATPase activity, coupled to movement of substances                                 | 20                     | 110                   | 0.045    |

**Supplementary script 1.** Java script to retrieve random sequences from a genome. This script requires the NGSEP Java tools for analysis of Next Generation Sequencing data. <http://sourceforge.net/projects/ngsep/>

Usage:

java -Xmx500M RandomSeqs <Genome path> <Sequence length> <Sequence number>

```
-----  
package org.cgiar.ciat.randomSeqs;  
  
import java.io.FileOutputStream;  
import java.io.IOException;  
import java.io.PrintWriter;  
import java.util.Random;  
import net.sf.ngstools.genome.Genome;  
import net.sf.ngstools.genome.GenomeAssembly;  
import net.sf.ngstools.sequences.io.FastaSequencesHandler;  
  
public class RandomSeqs {  
    public static void main(String[] args) throws IOException {  
  
        String fastaDir=args[0];  
        GenomeAssembly genFile = new GenomeAssembly(fastaDir);  
        int seqLength=Integer.parseInt(args[1]);  
        int numSeq=Integer.parseInt(args[2]);  
        PrintWriter outFile = new PrintWriter(new FileOutputStream(args[3]));  
        long START = 1;  
        long END = genFile.getTotalLength();  
        Random random = new Random();  
        String seqRandom=null;  
        int posRandom=0;  
  
        for (int idx = 1; idx <= numSeq; ++idx){  
  
            posRandom=showRandomInteger(START, END, random);  
            seqRandom=genFile.getSequenceByAbsolutePosition(posRandom, seqLength);  
            if( seqRandom!=null&&!seqRandom.contains("N") ){  
                outFile.println(">RandomSeq"+idx+"_"+x21+"_x1");  
                outFile.println(seqRandom);  
            }else {  
                idx--;  
            }  
        }  
        outFile.close();  
    }  
    private static int showRandomInteger(long aStart, long aEnd, Random aRandom){  
        if ( aStart > aEnd ) {  
            throw new IllegalArgumentException("Start cannot exceed End.");  
        }  
        long range = (long)aEnd - (long)aStart + 1;  
        long fraction = (long)(range * aRandom.nextDouble());  
        int randomNumber = (int)(fraction + aStart);  
        return randomNumber;  
    }  
}
```

## References

1. Hofacker IL, Fontana W, Stadler PF, Bonhoeffer LS, Tacker M, Schuster P: **Fast folding and comparison of RNA secondary structures.** *Monatshefte für Chemie* 1994, **125**(2):167-188
